# Supplementary material
Source: PubMed Central journal article supplement (PMC4185242)
Supplement: NIHMS622937-supplement-1.pdf [file NIHMS622937-supplement-1.pdf]

## Supplemental Figures

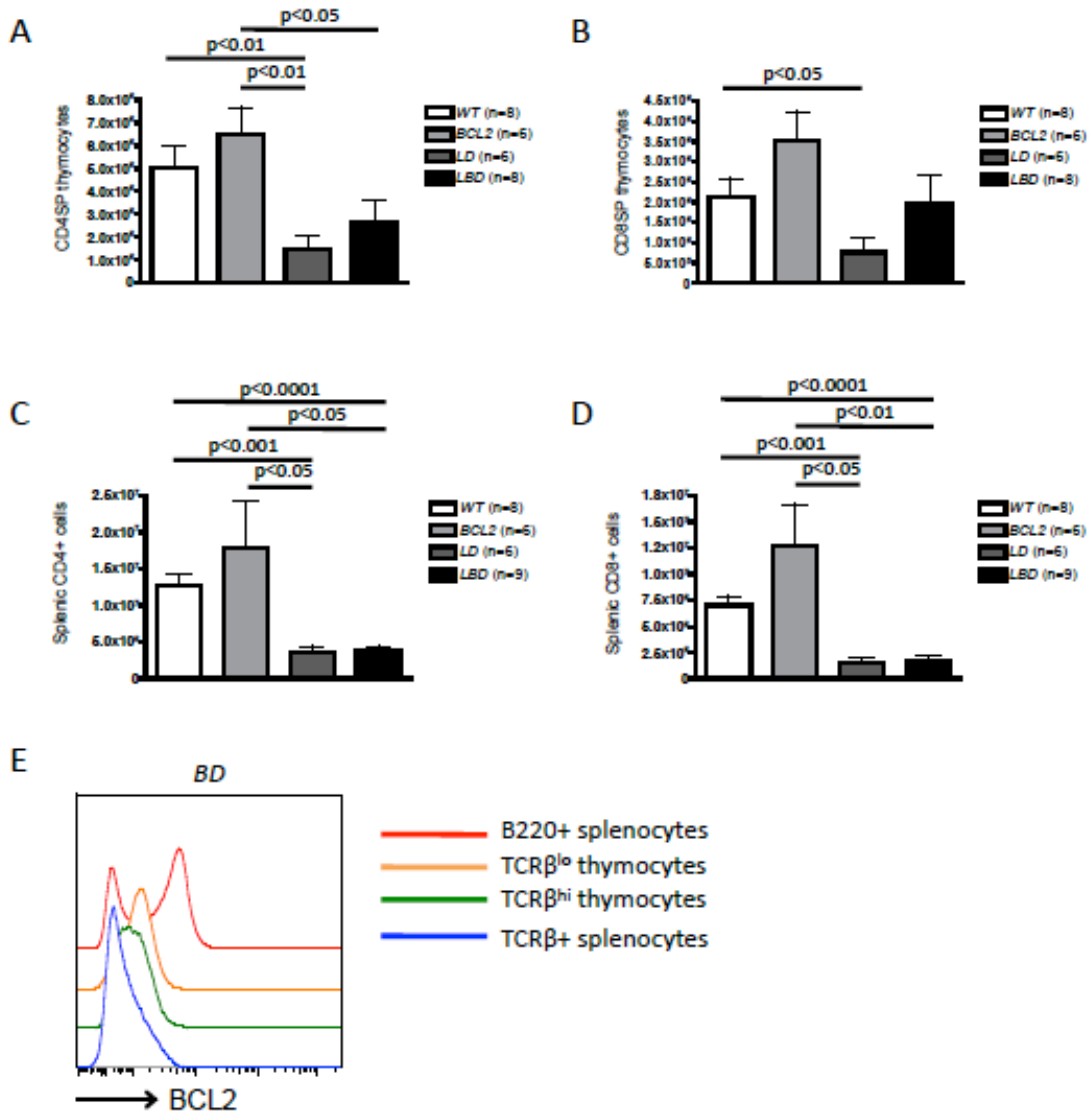

**Fig. S1. *EμBCL2* transgene rescues thymic cellularity in *LckCre;Dicer<sup>flx/flx</sup>* mice.** *A* and *B*, Numbers of CD4<sup>+</sup> (*A*) or CD8<sup>+</sup> (*B*) CD24<sup>lo</sup>TCRβ<sup>hi</sup> mature thymocytes in mice of the indicated genotypes. *C* and *D*, Numbers of CD4<sup>+</sup> (*C*) or CD8<sup>+</sup> (*D*) splenic T cells in mice of the indicated genotypes. *E*, Human BCL2 expression in thymocytes, splenic T cells, or B220<sup>+</sup> cells of a representative *EμBCL2* mouse as detected by intracellular flow cytometry. *A-D*, The number of mice analyzed is indicated. Each experiment was performed at least three times.

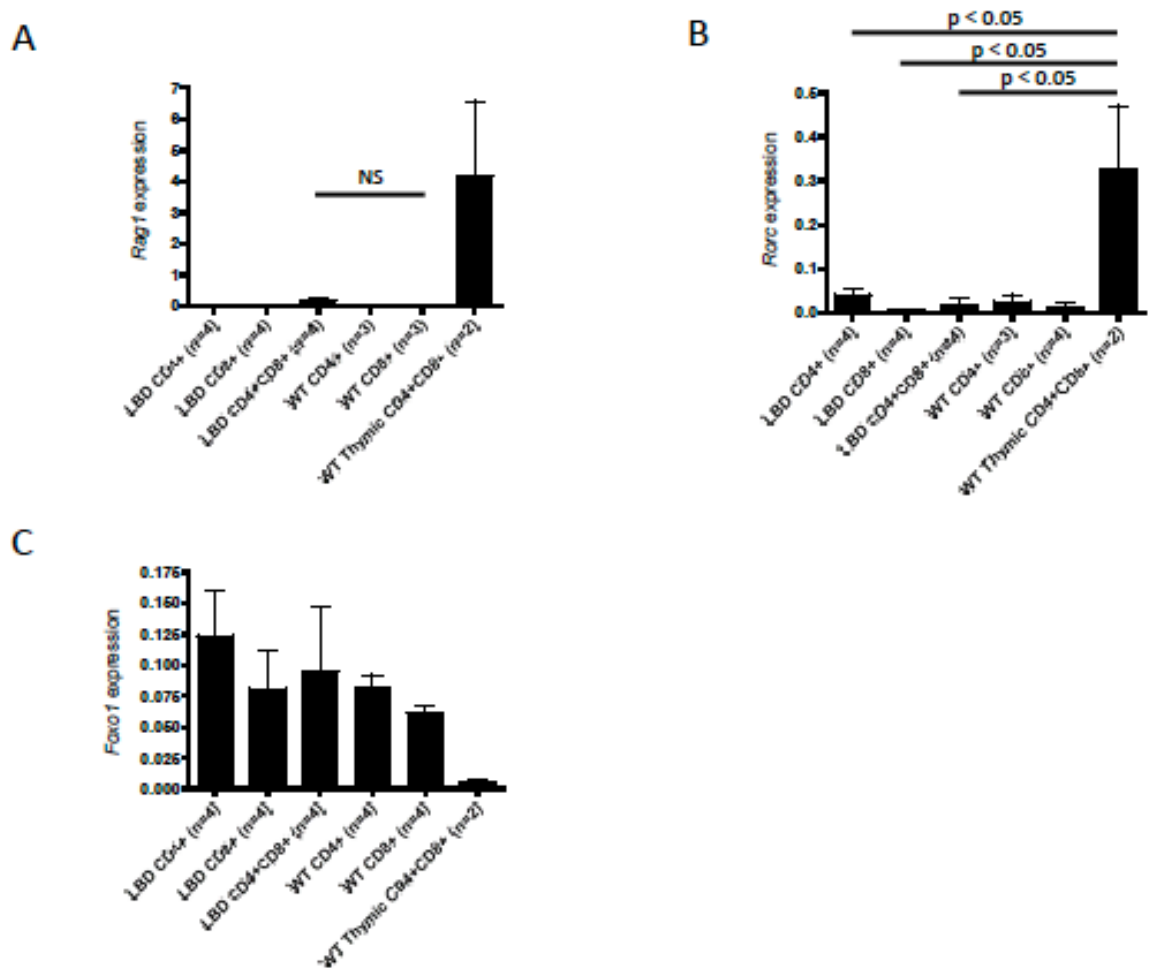

**Fig. S2. Characterization of aberrant CD4<sup>+</sup>CD8<sup>+</sup> splenic T cells from *LBD* mice.** A-C, *Rag1* (A), *Rorc* (B), or *Foxo1* (C) mRNA expression in sorted populations of the indicated genotypes. A-C, The numbers of mice analyzed are indicated. Each experiment was performed at least twice.

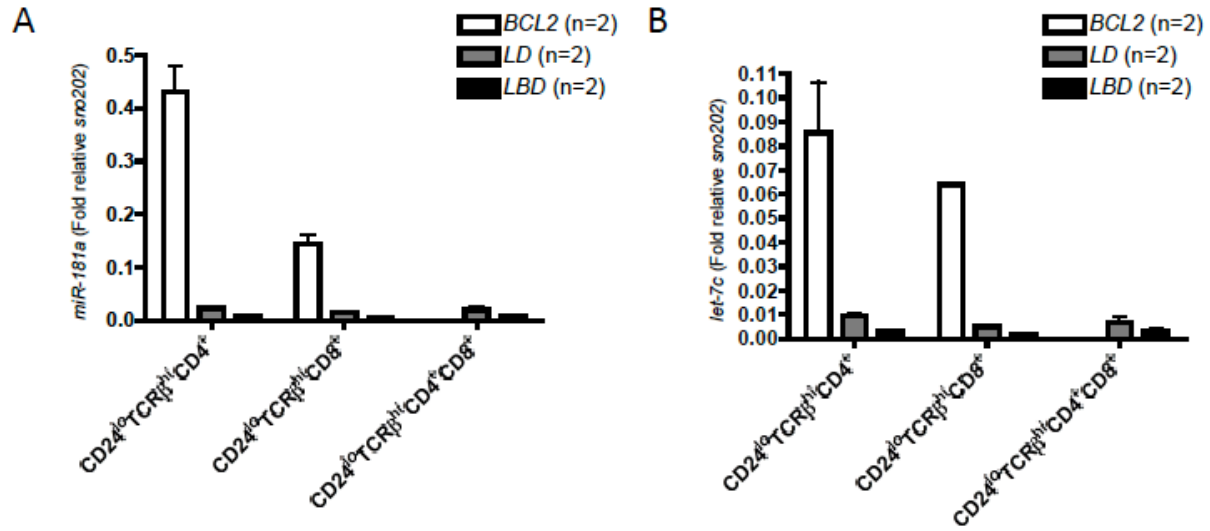

**Fig. S3. Equivalent miRNA loss in mature thymocytes from *LBD* mice exhibiting normal or impaired coreceptor silencing.** *A* and *B*, Expression of miR-181a (*A*) or let-7c (*B*) in sorted mature thymocyte (CD24<sup>lo</sup>TCRβ<sup>hi</sup>) populations from mice of the indicated genotypes. The numbers of mice analyzed are indicated. The experiment was performed twice.
